# Supplementary material for: Outcomes of Window Therapy with Carboplatin and Ifosfamide for Pediatric Osteosarcoma: A Case Series
Source: MDPI journal article supplement (doi:10.3390/children10040736), 2023-04-17
Supplement: s1 [file s1]

Supplemental Table S1. Patients' characteristics

| Number | Location         | Age (years) | Sex    | Subtype        | Response during window period | Histological response | Treatment          | Surgery        | Outcome | Details                                                                                                                         |
|--------|------------------|-------------|--------|----------------|-------------------------------|-----------------------|--------------------|----------------|---------|---------------------------------------------------------------------------------------------------------------------------------|
| 1      | Pelvis           | 12.9        | Female | Chondroblastic | SD                            | Grade 4               | On schedule        | Wide resection | DOD     | Recurrence at 10 months after mOS-91. As second-line treatment, ICE was administered and proton beam irradiation was performed. |
| 2      | Proximal humerus | 14.6        | Male   | Osteoblastic   | SD                            | Grade 2               | MTX/ADM front-load | Amputation     | NED     | Responded to MTX/ADM front-load. Presented in Figure 3.                                                                         |
| 3      | Distal femur     | 8.3         | Male   | Osteoblastic   | SD                            | Grade 2               | MTX/ADM front-load | Amputation     | NED     | Remained stable after alternation to MTX/ADM front-load.                                                                        |
| 4      | Distal femur     | 13.0        | Male   | Osteoblastic   | PD                            | Grade 3               | MTX/ADM front-load | Amputation     | DOD     | In the window therapy, due to the progression of the disease, spinal metastasis was pointed out.                                |
| 5      | Distal femur     | 8.5         | Male   | Osteoblastic   | PD                            | Grade 1               | MTX/ADM front-load | Amputation     | DOD     | Progressed after alternation to MTX/ADM front-load.                                                                             |

|   |              |      |      |                |    |         |                              |                |     |                                 |
|---|--------------|------|------|----------------|----|---------|------------------------------|----------------|-----|---------------------------------|
| 6 | Distal tibia | 12.9 | Male | Osteoblastic   | PR | Grade 3 | On schedule                  | Amputation     | NED | Presented in Figure 2.          |
| 7 | Distal femur | 13.8 | Male | Telangiectatic | PD | Grade 3 | Change to CDDP-based regimen | Wide resection | NED | Responded to CDDP-based regimen |

MTX, methotrexate; ADM, adriamycin; CDDP, cisplatin; SD, stable disease; PR, partial response; PD, progressive disease; DOD, died of disease; NED, no evidence of disease; mOS-91, modified mOS-91 regimen; IFO, ifosfamide; CBDCA, carboplatin; ICE, IFO + CBDCA + etoposide therapy
